# Supplementary material
Source: PubMed Central journal article supplement (PMC9131743)
Supplement: jama-e224835-s001.pdf [file jama-e224835-s001.pdf]

## Supplemental Online Content

Chang RW, Tucker L-Y, Rothenberg KA, et al. Incidence of ischemic stroke in patients with severe asymptomatic severe carotid stenosis without surgical intervention. *JAMA*. doi:10.1001/jama.2022.4835

**eTable 1.** Baseline Characteristics by Intervention Status (Per Unique Artery)

**eTable 2.** Predictors of Ipsilateral Acute Ischemic Stroke With Cox Regression Analysis

This supplemental material has been provided by the authors to give readers additional information about their work.

**eTable 1. Baseline Characteristics by Intervention Status (Per Unique Artery)**

| <b>Characteristics</b>                          | <b>Entire Cohort<br/>N=4230 (100)</b> | <b>Asymptomatic<br/>Intervention<br/>n=1691 (40)</b> | <b>No Intervention<br/>n=2539 (60)</b> | <b>P value<sup>a</sup></b> |
|-------------------------------------------------|---------------------------------------|------------------------------------------------------|----------------------------------------|----------------------------|
| Male, No. (%)                                   | 2428 (57.4)                           | 1088 (64.3)                                          | 1340 (52.8)                            | <0.001                     |
| Age, year, mean (SD)                            | 73.8 (9.5)                            | 71.5 (8.6)                                           | 75.3 (9.8)                             | <0.001                     |
| White, No. (%)                                  | 3099 (73.3)                           | 1287 (76.8)                                          | 1812 (71.0)                            | <0.001                     |
| Race/Ethnicity <sup>b</sup> , No. (%)           |                                       |                                                      |                                        | <0.001                     |
| White                                           | 3099 (73.3)                           | 1297 (76.7)                                          | 1802 (71.0)                            |                            |
| Asian                                           | 246 (5.8)                             | 82 (4.9)                                             | 164 (6.5)                              |                            |
| Black                                           | 178 (4.2)                             | 54 (3.2)                                             | 124 (4.9)                              |                            |
| Hispanic                                        | 406 (9.6)                             | 154 (9.1)                                            | 252 (9.9)                              |                            |
| Other                                           | 301 (7.1)                             | 104 (6.2)                                            | 197 (7.8)                              |                            |
| Systolic blood pressure, mmHg, mean (SD)        | 130.8 (19.1)                          | 131.1 (18.1)                                         | 130.6 (19.8)                           | 0.41                       |
| Diastolic blood pressure, mmHg, mean (SD)       | 68.2 (11.2)                           | 69.3 (10.7)                                          | 67.5 (11.2)                            | <0.001                     |
| Blood pressure < 140/90, No. (%)                | 3132 (74.0)                           | 1263 (74.7)                                          | 1869 (73.6)                            | 0.43                       |
| Creatinine, mg/dL, mean (SD)                    | 1.2 (0.9)                             | 1.1 (0.6)                                            | 1.3 (1.0)                              | <0.001                     |
| High-density lipoprotein, mean (SD)             | 46.4 (12.8)                           | 46.0 (12.3)                                          | 46.7 (13.0)                            | 0.07                       |
| Low-density lipoprotein, mean (SD)              | 93.5 (33.4)                           | 96.4 (34.6)                                          | 91.5 (32.4)                            | <0.001                     |
| Hematocrit, mean (SD)                           | 38.5 (4.9)                            | 39.5 (4.4)                                           | 37.8 (5.1)                             | <0.001                     |
| Triglyceride, mean (SD)                         | 147.8 (91.7)                          | 151.2 (88.7)                                         | 145.5 (93.6)                           | 0.04                       |
| High grade carotid stenosis, No. (%)            | 473 (11.2)                            | 249 (14.7)                                           | 224 (8.8)                              | <0.001                     |
| Contralateral disease, No. (%)                  |                                       |                                                      |                                        | 0.001                      |
| Normal <sup>c</sup>                             | 1870 (44.2)                           | 813 (48.1)                                           | 1057 (41.6)                            |                            |
| Moderate                                        | 1185 (28.0)                           | 434 (25.7)                                           | 751 (29.6)                             |                            |
| Severe                                          | 1002 (23.7)                           | 381 (22.5)                                           | 621 (24.5)                             |                            |
| Occluded                                        | 173 (4.1)                             | 63 (3.7)                                             | 110 (4.3)                              |                            |
| Remote history of stroke <sup>d</sup> , No. (%) | 81 (1.9)                              | 23 (1.4)                                             | 58 (2.3)                               | 0.03                       |
| Coronary artery disease, No. (%)                | 186 (4.4)                             | 59 (3.5)                                             | 127 (5.0)                              | 0.02                       |
| Diabetes, No. (%)                               | 909 (21.5)                            | 324 (19.2)                                           | 585 (23.0)                             | 0.003                      |

| Characteristics                                | Entire Cohort<br>N=4230 (100) | Asymptomatic<br>Intervention<br>n=1691 (40) | No Intervention<br>n=2539 (60) | P value <sup>a</sup> |
|------------------------------------------------|-------------------------------|---------------------------------------------|--------------------------------|----------------------|
| Chronic obstructive pulmonary disease, No. (%) | 39 (0.9)                      | 10 (0.6)                                    | 29 (1.1)                       | 0.07                 |
| Peripheral arterial disease, No. (%)           | 208 (4.9)                     | 83 (4.9)                                    | 125 (4.9)                      | 0.98                 |
| Atrial fibrillation, No. (%)                   | 93 (2.2)                      | 29 (1.7)                                    | 64 (2.5)                       | 0.08                 |
| Hypertension, No. (%)                          | 697 (16.5)                    | 271 (16.0)                                  | 426 (16.8)                     | 0.52                 |
| COPS2, median (IQR)                            | 27 (10-50)                    | 21 (10-39)                                  | 33 (14-59)                     | <0.001               |
| BMI, kg/m <sup>2</sup> , mean (SD)             | 27.8 (5.5)                    | 28.2 (5.2)                                  | 27.5 (5.6)                     | <0.001               |
| Smoking history, No. (%)                       |                               |                                             |                                | <0.001               |
| Never                                          | 1103/3758 (29.4)              | 392/1513 (26.1)                             | 710/2245 (31.6)                |                      |
| Current                                        | 516/3758 (13.7)               | 233/1513 (15.4)                             | 283/2245 (12.6)                |                      |
| Former                                         | 2139/3758 (56.9)              | 887/1513 (58.6)                             | 1252/2245 (55.8)               |                      |

SD, standard deviation; COPS2, comorbidity point score<sup>2</sup>; IQR, interquartile range.

- <sup>a</sup> Comparisons between 2 surgical routes tested using  $\chi^2$  tests for categorical variables and independent two-sample t-tests for all continuous variables but COPS2 which was compared using Mann-Whitney U (Wilcoxon rank-sum) test.
- <sup>b</sup> Race/Ethnicity data was patient self-reported: Asian was defined as non-Hispanic/Latinx Asian including Pacific Islanders and Native Hawaiian; Black was defined as non-Hispanic/Latinx African Americans; Hispanic/Latinx included any races; White was defined as non-Hispanic/Latinx Caucasian; Other was defined as non-Hispanic/Latinx American Indians, Alaskan Natives, more than race, and unknown (n = 4).
- <sup>c</sup> Including 11 carotid arteries with unknown stenosis.
- <sup>d</sup> Defined as any stroke occurred more than 6 months prior to the index study found in the electronic health record.

**eTable 2. Predictors of Ipsilateral Acute Ischemic Stroke With Cox Regression Analysis**

| Demographic/Clinical Characteristic                | Unadjusted Hazard Ratio (95% Confidence Interval) | Adjusted Hazard Ratio (95% Confidence Interval) | P value |
|----------------------------------------------------|---------------------------------------------------|-------------------------------------------------|---------|
| <b>At baseline</b>                                 |                                                   |                                                 |         |
| Age (per additional 10 years)                      | 1.27 (1.05-1.54)                                  | 1.25 (1.02-1.53)                                | 0.03    |
| Male                                               | 0.72 (0.51-1.02)                                  | 0.76 (0.53-1.09)                                | 0.14    |
| High grade carotid stenosis                        | 1.62 (1.00-2.64)                                  | 1.73 (1.06-2.84)                                | 0.03    |
| Contralateral disease                              |                                                   |                                                 |         |
| Normal                                             | 1 (reference)                                     | --                                              | --      |
| Moderate                                           | 0.88 (0.58-1.35)                                  | --                                              | --      |
| Severe                                             | 0.98 (0.64-1.50)                                  | --                                              | --      |
| Occluded                                           | 1.76 (0.84-3.69)                                  | --                                              | --      |
| History of contralateral acute ischemic stroke     | 3.06 (1.84-5.09)                                  | 2.81 (1.63-4.84)                                | <0.001  |
| History of contralateral transient ischemic attack | 0.75 (0.19-3.02)                                  | --                                              | --      |
| COPS2 (per additional 10 points)                   | 1.06 (1.01-1.11)                                  | 1.01 (0.95-1.07)                                | 0.77    |
| BMI, kg/m <sup>2</sup> (per 5 kg/m <sup>2</sup> )  | 1.04 (0.89-1.21)                                  | --                                              | --      |
| Systolic BP, mmHg (per additional 10 mmHg)         | 1.08 (0.99-1.17)                                  | 1.10 (1.00-1.21)                                | 0.06    |
| Diastolic BP, mmHg (per additional 10 mmHg)        | 0.95 (0.81-1.11)                                  | 0.89 (0.74-1.07)                                | 0.21    |
| HCT (per additional 10 points)                     | 0.94 (0.66-1.33)                                  | --                                              | --      |
| Creatinine, mg/dL                                  | 0.92 (0.71-1.20)                                  | --                                              | --      |
| Cholesterol, mg/dL                                 | 1.00 (1.00-1.01)                                  | --                                              | --      |
| LDL, mg/dL                                         | 1.00 (1.00-1.01)                                  | 1.00 (1.00-1.01)                                | 0.31    |
| HDL, mg/dL                                         | 0.99 (0.98-1.00)                                  | 0.99 (0.98-1.01)                                | 0.21    |
| Triglycerides, mg/dL                               | 1.00 (1.00-1.00)                                  | 1.00 (1.00-1.00)                                | 0.30    |
| Diabetes mellitus                                  | 1.52 (1.05-2.21)                                  | 1.40 (0.93-2.12)                                | 0.10    |
| Coronary artery disease                            | 0.80 (0.33-1.95)                                  | --                                              | --      |
| Atrial fibrillation                                | 1.22 (0.39-3.83)                                  | --                                              | --      |
| Hypertension                                       | 1.04 (0.66-1.63)                                  | --                                              | --      |
| Smoking history                                    |                                                   |                                                 |         |
| Never                                              | 1 (Reference)                                     | --                                              | --      |

| Demographic/Clinical Characteristic   | Unadjusted Hazard Ratio (95% Confidence Interval) | Adjusted Hazard Ratio (95% Confidence Interval) | P value |
|---------------------------------------|---------------------------------------------------|-------------------------------------------------|---------|
| Former                                | 0.99 (0.66-1.48)                                  | --                                              | --      |
| Yes                                   | 1.01 (0.55-1.84)                                  | --                                              | --      |
| Unknown                               | 0.88 (0.49-1.59)                                  | --                                              | --      |
| Medical therapy <sup>a</sup>          |                                                   |                                                 |         |
| Anticoagulation                       | 1.70 (1.06-2.74)                                  | 1.23 (0.64-2.36)                                | 0.53    |
| Antihypertensive                      | 0.80 (0.49-1.32)                                  | --                                              | --      |
| Statin                                | 0.75 (0.52-1.10)                                  | 1.09 (0.68-1.74)                                | 0.73    |
| Medical therapy adherent <sup>b</sup> |                                                   |                                                 |         |
| Anticoagulation                       | 2.92 (1.43-5.98)                                  | 1.72 (0.69-4.32)                                | 0.24    |
| Antihypertensive                      | 1.04 (0.70-1.54)                                  | --                                              | --      |
| Statin                                | 0.92 (0.64-1.31)                                  | --                                              | --      |
| <b><i>During follow-up</i></b>        |                                                   |                                                 |         |
| Medical therapy <sup>a</sup>          |                                                   |                                                 |         |
| Anticoagulation                       | 0.84 (0.57-1.25)                                  | --                                              | --      |
| Antihypertensive                      | 0.80 (0.38-1.72)                                  | --                                              | --      |
| Statin                                | 0.37 (0.23-0.60)                                  | 0.38 (0.21-0.72)                                | 0.003   |
| Medical therapy adherent <sup>b</sup> |                                                   |                                                 |         |
| Anticoagulation                       | 1.73 (1.04-2.88)                                  | 1.22 (0.74-2.39)                                | 0.34    |
| Antihypertensive                      | 1.19 (0.70-2.04)                                  | --                                              | --      |
| Statin                                | 0.73 (0.52-1.04)                                  | 0.91 (0.59-1.38)                                | 0.64    |

--, not included in the model; COPS2, comorbidity point score<sup>2</sup>; BMI, body mass index; BP, blood pressure; HCT, hematocrit; LDL, low-density lipoproteins; HDL, high-density lipoproteins.

<sup>a</sup> Medical therapy defined as at least one filled prescription in the 12 months prior to study entry. During follow-up this was adjusted to at least one filled prescription in each year of follow-up.

<sup>b</sup> Medical therapy adherent was defined using >80% MPR as described in Methods.
